# Supplementary material for: The effect of metformin in clinical studies on knee osteoarthritis: an updated systematic review and meta-analysis
Source: Front Med (Lausanne). 2025 Oct 16;12:1652732. doi: 10.3389/fmed.2025.1652732 (PMC12571718; doi:10.3389/fmed.2025.1652732)
Supplement: Supplementary file 2 [file Table_2.xlsx]

## Sheet: Sheet1
Embase	("Metformin"[MeSH Terms] OR ("Metformin"[MeSH Terms] OR "Metformin"[All Fields] OR "dimethylbiguanidine"[All Fields] OR ("Metformin"[MeSH Terms] OR "Metformin"[All Fields] OR "dimethylguanylguanidine"[All Fields]) OR ("Metformin"[MeSH Terms] OR "Metformin"[All Fields] OR "glucophage"[All Fields] OR "metformine"[All Fields] OR "metformin s"[All Fields] OR "metformins"[All Fields]) OR ("Metformin"[…
Web of Science	['1, 1 dimethylbiguanide' OR 'anj 900' OR 'anj900' OR 'apophage' OR 'aron' OR 'benofomin' OR 'dabex' OR 'denkaform' OR 'deson' OR 'dextin' OR 'diabetase' OR 'diabetase s' OR 'diabetformin' OR 'diabetmin' OR 'diabetmin retard' OR 'diabetosan' OR 'diabex' OR 'diafat' OR 'diaformin' OR 'diaformina' OR 'diaformina lp' OR 'diametin' OR 'diamin' OR 'dianben' OR 'diformin' OR 'diformin retard' OR 'dimef…
Pubmed	(("Metformin"[Mesh]) OR (((((((Dimethylbiguanidine) OR (Dimethylguanylguanidine)) OR (Glucophage)) OR (Metformin Hydrochloride)) OR (Hydrochloride, Metformin)) OR (Metformin HCl)) OR (HCl, Metformin))) AND (("Osteoarthritis"[Mesh]) OR ((((((((((Osteoarthritides) OR (Osteoarthrosis)) OR (Osteoarthroses)) OR (Arthritis, Degenerative)) OR (Arthritides, Dege nerative)) OR (Degenerative Arthritides)) …
